# Supplementary material for: Enhanced Electroluminescence via a Nanohybrid Material Consisting of Aromatic Ligand-Modified InP Quantum Dots and an Electron-Blocking Polymer as the Single Active Layer in Quantum Dot–LEDs
Source: MDPI journal article supplement (doi:10.3390/nano12030408), 2022-01-26
Supplement: s1 [file s1]

# Enhanced Electroluminescence via a Nanohybrid Material Consisting of Aromatic Ligand-Modified InP Quantum Dots and an Electron-Blocking Polymer as the Single Active Layer in Quantum Dot–LEDs

Hyung-Seok Choi <sup>1</sup>, Silvia Janietz <sup>1</sup>, Vladimir Roddatis <sup>2</sup>, Andre Geßner <sup>1</sup>, Armin Wedel <sup>1</sup>, Jiyong Kim <sup>1,\*</sup> and Yohan Kim <sup>1,\*</sup>

- <sup>1</sup> Functional Polymer Systems, Fraunhofer Institute for Applied Polymer Research (IAP), Geiselbergstrasse 69, 14476 Potsdam, Germany; hyung.seok.choi@iap.fraunhofer.de (H.-S.C.); silvia.janietz@iap.fraunhofer.de (S.J.); andre.gessner@iap.fraunhofer.de (A.G.); armin.wedel@iap.fraunhofer.de (A.W.)
- <sup>2</sup> GFZ German Research Center for Geosciences, Helmholtz Centre Potsdam, Telegrafenberg, 14473 Potsdam, Germany; vladimir.roddatis@gfz-potsdam.de
- \* Correspondence: jiyong.kim@iap.fraunhofer.de (J.K.); yohan.kim@iap.fraunhofer.de (Y.K.)

**Table S1.** HOMO level (measured by photoelectron spectroscopy), optical band gap and LUMO level (calculated from 1<sup>st</sup> excitation peak of absorption spectrum) of QDs and PBCTA.

| QD      | HOMO<br>(eV) | LUMO<br>(eV) | Optical bandgap<br>(eV) |
|---------|--------------|--------------|-------------------------|
| QD–OcSH | 5.2          | 3.0          | 2.2                     |
| QD–PBSH | 5.4          | 3.2          | 2.2                     |
| QD–TP   | 5.5          | 3.3          | 2.2                     |
| PBCTA   | 5.6          | 1.9          | 3.7                     |

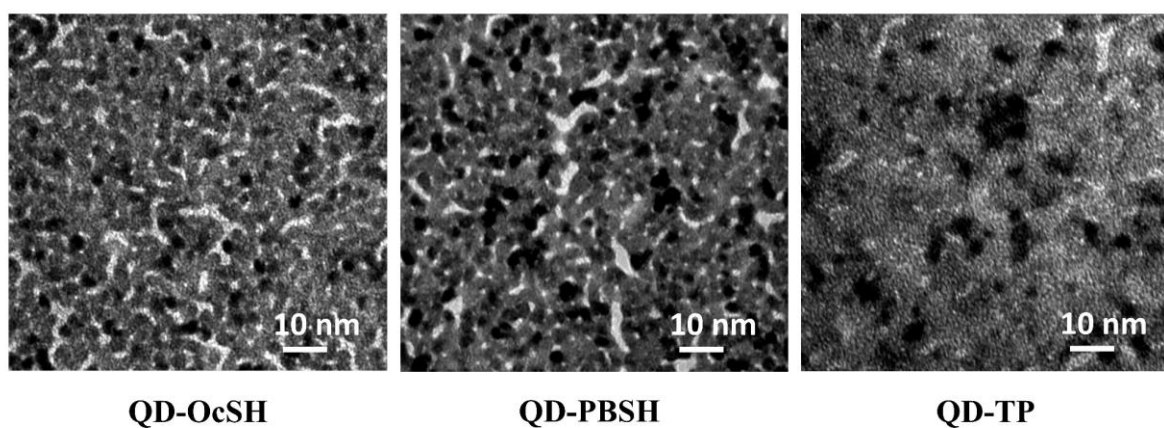

**Figure S1.** TEM image of QD-OcSH, QD-PBSH and QD-TP. The average diameter of QD-OcSH, QD-PBSH QD-TP is  $5.41 \pm 0.64$ ,  $5.43 \pm 1.00$ , and  $5.37 \pm 0.71$  nm ( $n = 200$ ), respectively. Dot-to-dot distance of each QD was 1.27 nm and 1.61 nm and unmeasurable for the QD-TP aggregation.

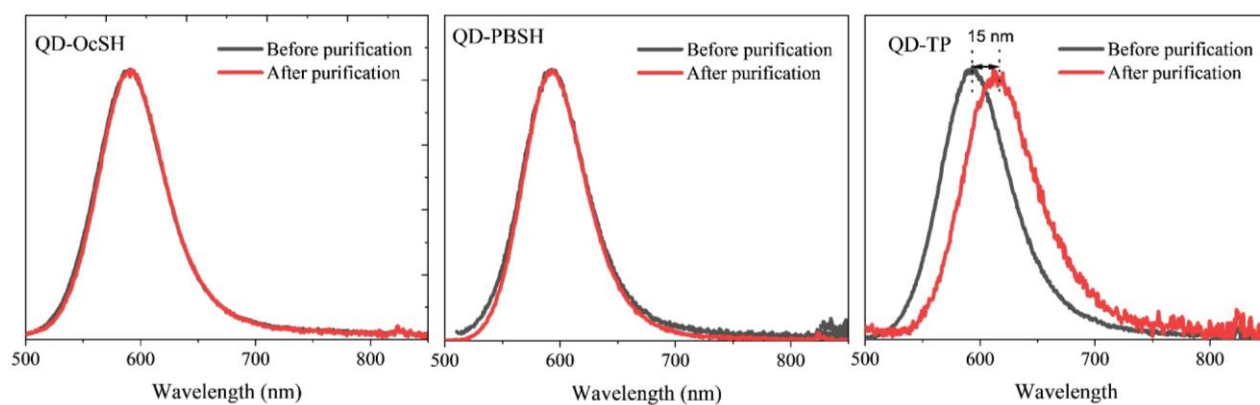

**Figure S2.** Emission spectrum of (a) QD-OcSH, (b) QD-PBSH, and (c) QD-TP before and after purification.

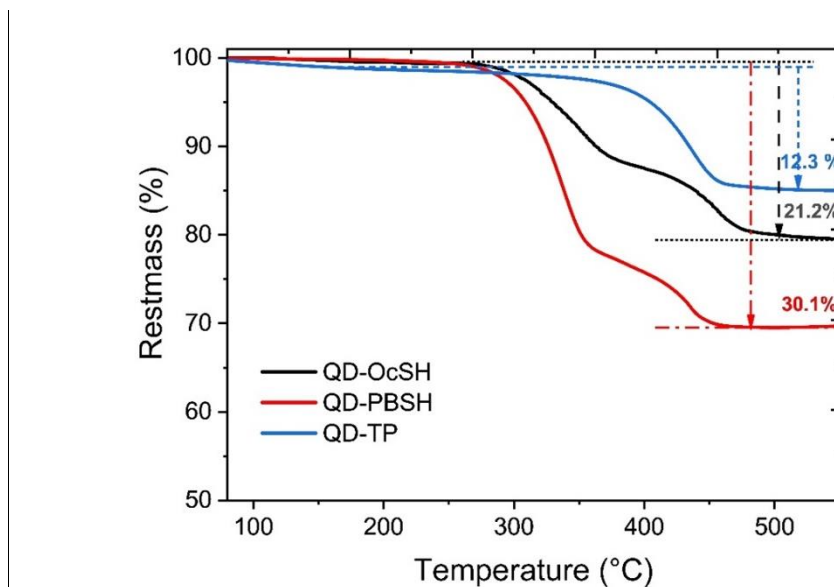

**FigureS3.** The thermogravimetric analysis (TGA) result of QD–OcSH, QD–PBSH and QD–TP.

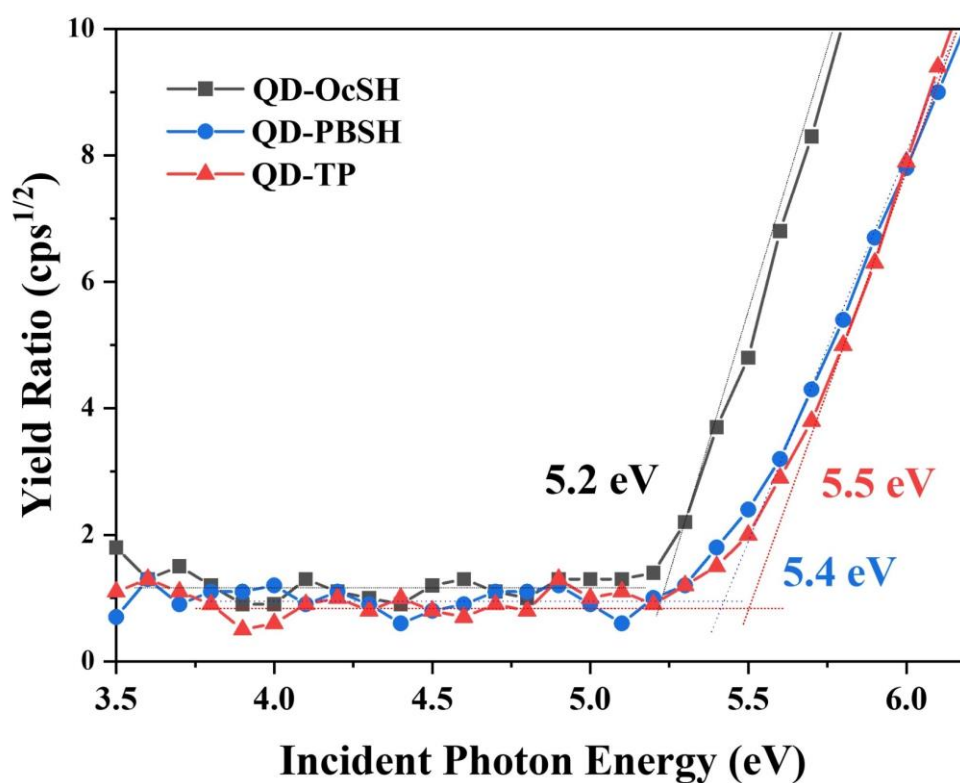

**Figure S4.** Photoelectron spectroscopy in Air (AC-2) measured throughout incident photon energy range of 3.4 eV to 6.2 eV.

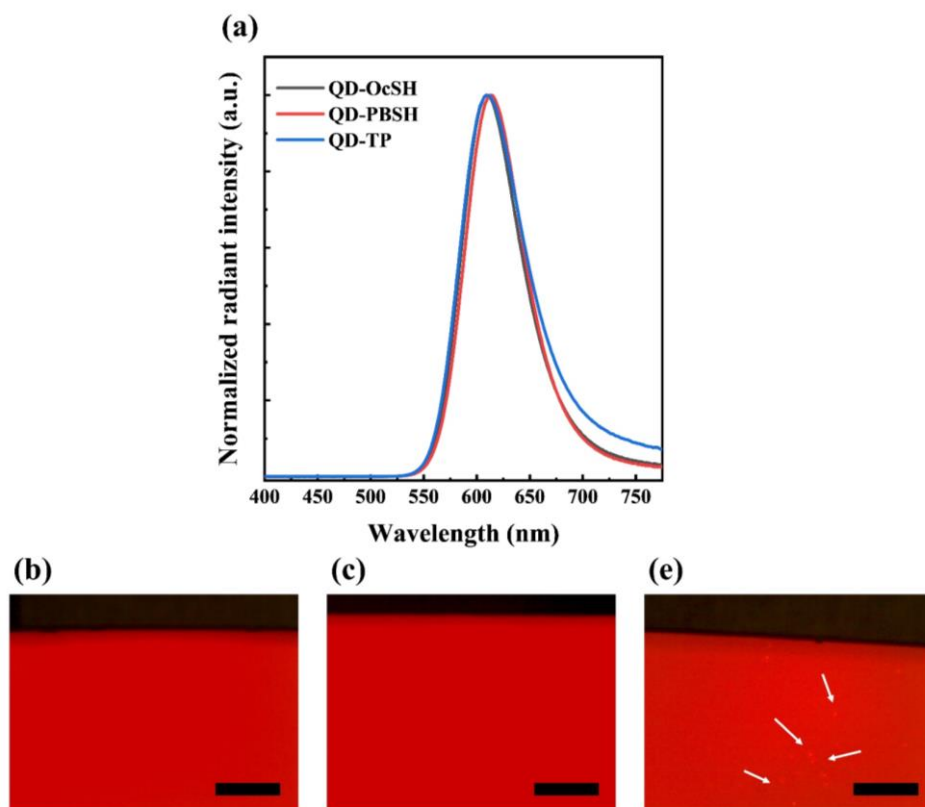

**Figure S5.** Normalized EL spectrum of QD-OcSH, QD-PBSH, and QD-TP with (a) linear and (b) logarithmic scale in the y-axis, and their EL images (scale bar: 0.5 mm) of (b) QD-OcSH, (c) QD-PBSH, and (d) QD-TP, respectively. No parasitic peaks at 500–540 nm originating from HTL (TCTA) were observed.

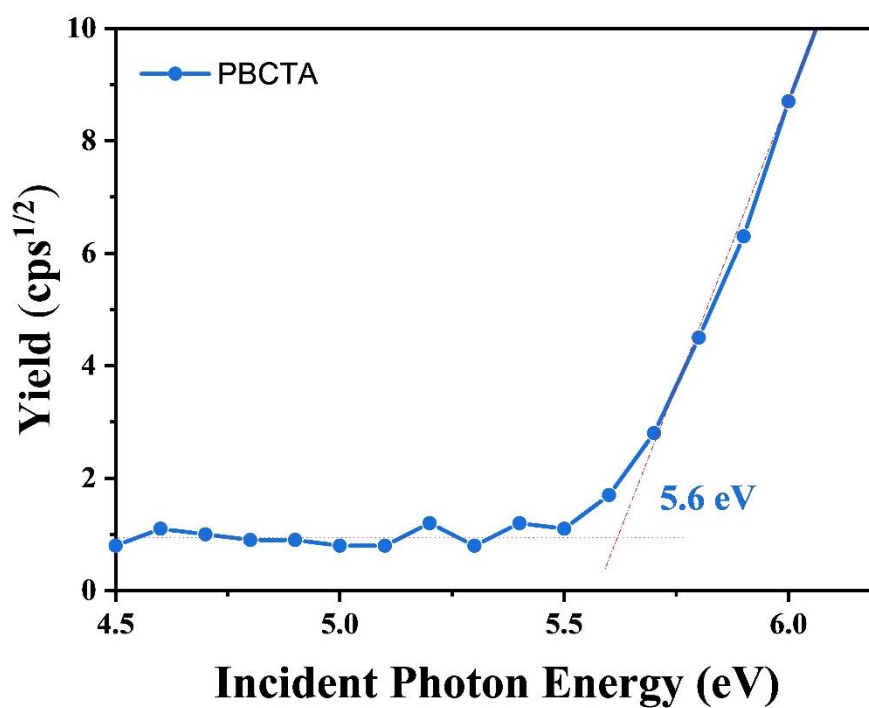

**Figure S6.** Photoelectron spectroscopy in Air (AC-2) of PBCTA.

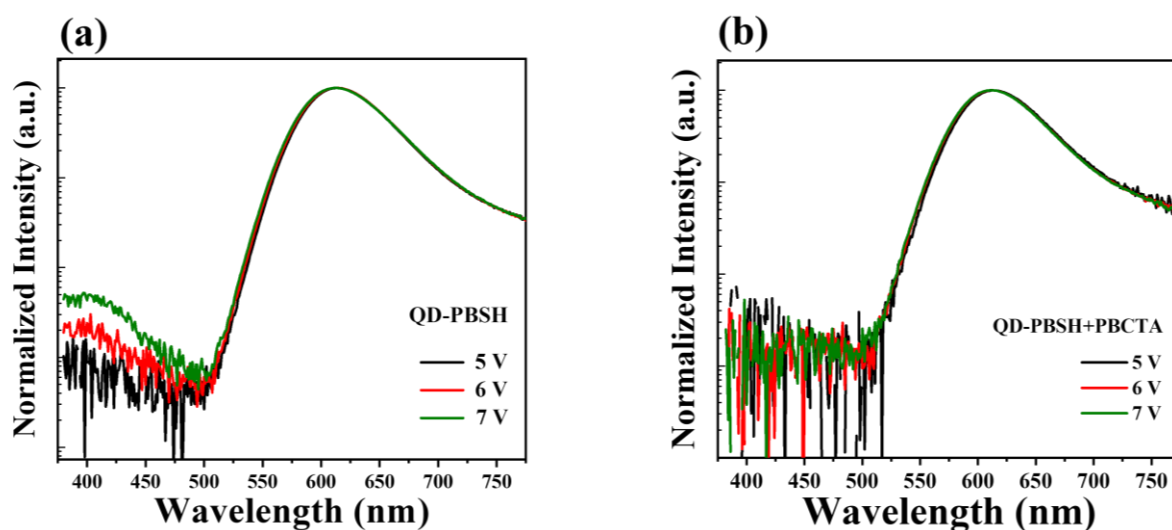

**Figure S7.** EL emission of (a) QD-PBSH and (b) QD-PBSH+PBCTA in a logarithmic scale. Parasitic emission of the HTL can only be observed at the peak around 420 nm for QD-PBSH.

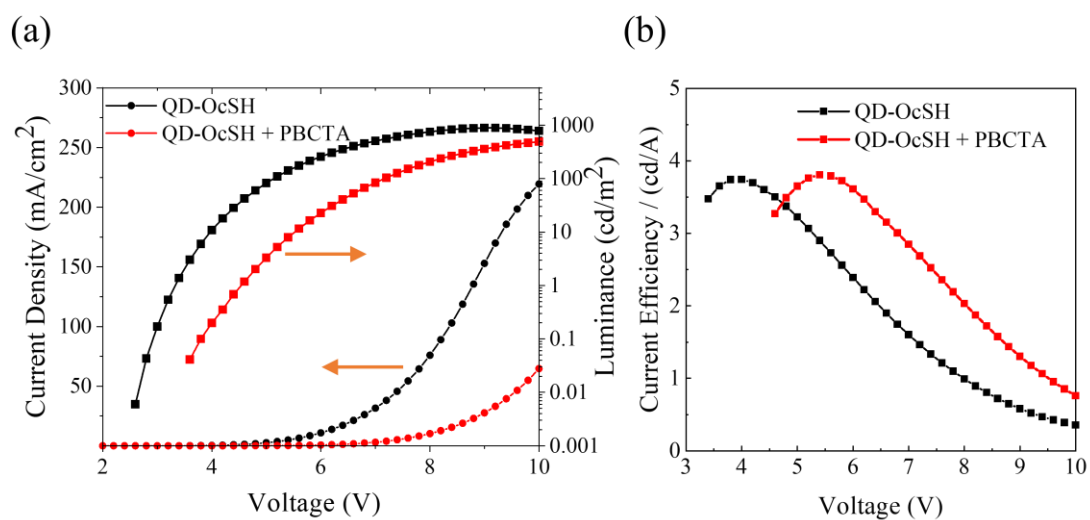

**Figure S8.** (a) Current density luminance voltage (J-L-V) and (b) Current efficiency voltage graphs of the QD-LED device with QD-OcSH/PBCTA nanohybrid material.
